# Supplementary material for: Prediction of the concentration dependence of the surface tension and density of salt solutions: atomistic simulations using Drude oscillator polarizable and nonpolarizable models
Source: Royal Society of Chemistry journal article supplement (doi:10.1039/c3cp50904d), 2013-01-01
Supplement: c3cp50904d.pdf [file c3cp50904d.pdf]

## Electronic Supplementary Information

### Prediction of the concentration dependence of the surface tension and density of salt solutions: atomistic simulations with Drude oscillator polarizable and nonpolarizable models.

#### 1 Nonpolarizable water models

Two nonpolarizable models for water are considered: the SPC/E<sup>1</sup> and TIP4P/2005<sup>2</sup> models. The SPC/E model represents the water molecules as rigid molecules with three point masses with OH distance of 1 Å and HOH angle equal to the tetrahedral angle. The TIP4P/2005 water model<sup>2</sup> is a rigid four-point model with three points charges and one Lennard-Jones interaction site located at the oxygen atom. The Lennard-Jones parameters and the partial charges are given in Table S1 for these two models.

**Table S1** The Lennard-Jones well depth  $\epsilon$  and size  $\sigma$ , partial charges  $q$  for the two nonpolarizable water models,  $k_B$  is the Boltzmann's constant.

| SPC/E model <sup>1</sup> |              |                    |               |
|--------------------------|--------------|--------------------|---------------|
|                          | $\sigma$ (Å) | $\epsilon/k_B$ (K) | $q$ ( $ e $ ) |
| O                        | 3.166        | 78.205             | -0.8476       |
| H                        | 0            | 0                  | 0.4238        |
| OH distance / (Å)        | 1.0          |                    |               |
| H-O-H angle / (deg)      | 109.47       |                    |               |

  

| TIP4P/2005 model <sup>2</sup> |              |                    |               |
|-------------------------------|--------------|--------------------|---------------|
|                               | $\sigma$ (Å) | $\epsilon/k_B$ (K) | $q$ ( $ e $ ) |
| O                             | 3.1589       | 93.2               | 0             |
| H                             | 0            | 0                  | 0.5564        |
| M                             | 0            | 0                  | -1.1128       |
| OH distance / (Å)             | 0.9572       |                    |               |
| H-O-H angle / (deg)           | 104.52       |                    |               |
| OM distance / (Å)             | 0.1546       |                    |               |

#### References

- 1 H. J. C. Berendsen, J. R. Grigera and T. P. Straatsma, *J. Phys. Chem.*, 1987, **91**, 6269–6271.
- 2 J. L. F. Abascal and C. Vega, *J. Chem. Phys.*, 2005, **123**, 234505.
